# Supplementary material
Source: PubMed Central journal article supplement (PMC5673271)
Supplement: jc.2017-01102.st1.pdf [file jc.2017-01102.st1.pdf]

**Supplementary Table 1.** Phenotypic characteristics of patients and their *NOTCH2* mutations (reference sequence: NM\_024408.3).

|                                     | Patient 1    | Patient 2         | Patient 3    | Patient 4    | Patient 5        |
|-------------------------------------|--------------|-------------------|--------------|--------------|------------------|
| Gender                              | Female       | Male              | Male         | Male         | Female           |
| Age at first assessment (years)     | 14.7         | 6.7               | 15.3         | 10.4         | 9.1              |
| Calendar Year                       | 2010         | 2002              | 2008         | 1998         | 2015             |
| Height in cm (z-score)†             | 139.1 (-3.5) | 118.0 (-0.4)      | 161.2 (-1.3) | 124.8 (-2.4) | 125.3 (-1.4)     |
| Weight in kg (z-score)†             | 57.0 (0.5)   | 21.5 (-0.28)      | 51.9 (-0.6)  | 29.6 (-0.7)  | 23.8 (-1.27)     |
| BMI in kg/m <sup>2</sup> (z-score)† | 29.5 (1.8)   | 15.6 (0.0)        | 20.0 (0.0)   | 19.0 (0.8)   | 15.2 (-0.6)      |
| Mutation                            | c.6902T>A    | c.6662_6663delTG  | c.6787C>T    | N/A          | c.6724_6725delAG |
| Protein                             | p.Leu2301*   | p.Val2221Glufs*22 | p.Gln2263*   | N/A          | p.Ser2242*       |
| <b>Mobility</b>                     |              |                   |              |              |                  |
| Normal                              |              | +                 | +            |              | +                |
| Wheelchair-bound                    | +            |                   |              |              |                  |
| <b>Craniofacial Findings</b>        |              |                   |              |              |                  |
| Synophrys                           | +            | +                 |              | +            |                  |
| Midfacial flattening                | +            | +                 |              | +            |                  |
| Downslanted palpebral fissures      | +            | +                 |              | +            | +                |
| Hypertelorism                       | +            | +                 | +            | +            | +                |
| Wide nose                           | +            | +                 |              | +            |                  |
| Long philtrum                       | +            | +                 |              | +            | +                |
| Thin lips                           | +            | +                 |              | +            | +                |
| Low set ears                        |              | +                 | +            | +            | +                |
| Retro/micrognathia                  | +            | +                 | +            | +            | +                |
| High narrow/cleft palate            | +            | +                 | +            | +            | +                |
| Down turned mouth                   | +            | +                 |              | +            |                  |
| Pale skin                           | +            |                   |              |              |                  |
| Large head circumference            | +            | +                 |              | +            | +                |
| Prominent eyes                      | +            | +                 |              |              |                  |
| <b>Abnormal dentition</b>           |              |                   |              |              |                  |
| Irregular wide-spaced teeth         | +            | +                 |              |              |                  |
| Loss of teeth                       | +            | +                 | +            | +            |                  |
| Short roots of permanent teeth      |              | +                 |              |              |                  |
| Malocclusion                        |              |                   |              | +            |                  |
| Hypoplastic distal phalanges        | +            | +                 | +            | +            |                  |
| Broad thumbs                        | +            | +                 |              |              |                  |
| Single palmar creases               | +            |                   |              |              |                  |
| Hyperconvex nails                   | +            | +                 |              |              |                  |
| Hearing impairment                  | +            | +                 | +            | +            |                  |
| Coarse voice                        | +            | +                 |              | +            |                  |
| Coarse hair                         | +            | +                 |              |              |                  |
| Coarse/dry skin                     | +            | +                 |              |              |                  |
| Congenital heart defect (VSD)       |              |                   |              | +            |                  |
| Upper airway obstruction            |              |                   |              | +            |                  |
| Developmental delay                 |              |                   | +            |              |                  |
| GI malrotation                      |              | +                 |              |              |                  |
| <b>Endocrine Features</b>           |              |                   |              |              |                  |
| Short stature                       | +            |                   |              | +            |                  |
| Delayed puberty                     | +            |                   |              |              |                  |
| Hypospadias                         |              | +                 |              | +            |                  |
| <b>Renal comorbidities</b>          |              |                   |              |              |                  |
| Polycystic kidneys                  | +            |                   |              | +            |                  |

† Z-scores calculated using LMS parameters from National health and nutrition survey (NHANES), CDC/National Center for Health Statistics.

[https://www.cdc.gov/growthcharts/percentile\\_data\\_files.htm](https://www.cdc.gov/growthcharts/percentile_data_files.htm)

Flegal KM, Cole TJ. Construction of LMS parameters for the Centers for Disease Control and Prevention 2000 growth charts. Natl Health Stat Report. 2013;(63):1-3.

**Supplementary Table 2.** Radiographic findings of 5 children with HCS (whole observation period).

| <b>Radiographic findings</b>                                 |           |           |           |           |           |
|--------------------------------------------------------------|-----------|-----------|-----------|-----------|-----------|
|                                                              | Patient 1 | Patient 2 | Patient 3 | Patient 4 | Patient 5 |
| <b>HEAD</b>                                                  |           |           |           |           |           |
| Wormian Bones                                                | +         | +         | +         |           | +         |
| Platybasia                                                   | +         |           |           | +         |           |
| Basilar invagination                                         | +         |           |           | +         | +         |
| Bathrocephaly                                                |           |           |           |           | +         |
| Scaphocephalus                                               | +         |           |           | +         |           |
| Open skull sutures                                           | +         |           |           |           | +         |
| Chiari malformation                                          | +         |           |           | +         |           |
| Dilatation of ventricles                                     | +         | +         |           | +         |           |
| Thin corpus callosum                                         | +         |           |           |           |           |
| Thin superior cerebellar peduncles                           | +         |           |           |           |           |
| Arachnoid cyst posterior fossa with defect in occipital bone |           | +         |           |           |           |
| Tympanic bone incompletely formed                            |           | +         |           |           |           |
| Irregular temporomandibular joint                            |           | +         |           |           |           |
| <b>SPINE</b>                                                 |           |           |           |           |           |
| Vertebral fractures*                                         | +         |           | +         | +         | +         |
| Syringomyelia                                                | +         |           |           | +         |           |
| Spondylolisthesis                                            |           | +         |           |           |           |
| Scoliosis- kyphosis                                          | +         | +         | +         | +         |           |
| Sclerosis of anterior vertebral endplates                    | +         | +         | +         |           |           |
| Osteoporosis/osteopenia*                                     | +         | +         | +         | +         | +         |
| <b>LIMBS</b>                                                 |           |           |           |           |           |
| Fracture of long bones*                                      | +         | +         | +         | +         |           |
| Acroosteolysis hands and feet                                | +         | +         | +         | +         | +         |
| Fibular bowing (serpentine fibulae)                          |           | +         |           | +         | +         |
| Hip acetabular dysplasia                                     | +         |           |           |           |           |
| Hip protrusio                                                | +         |           |           | +         |           |
| Loss of normal femoral epiphysis                             | +         |           |           |           |           |
| Valgus deformity at the knees                                |           | +         |           |           |           |
| Abnormal ankle mortise                                       |           | +         |           |           |           |
| Accessory naviculae                                          |           |           |           |           | +         |
| Metatarsus varus and adductus                                |           |           |           |           | +         |
| Hallus valgus                                                |           | +         |           |           |           |
| Bilateral radial dislocation                                 |           |           | +         |           |           |

\* Osteoporosis was diagnosed by the responsible clinician based on diagnostic criteria valid at the time. P1,2,3,5 would have met the 2013 ISCD diagnostic criteria before treatment and patient 4 during treatment. For ISCD criteria, see

Crabtree NJ, Arabi A, Bachrach LK, Fewtrell M, El-Hajj Fuleihan G, Kecksemethy HH, Jaworski M, Gordon CM; International Society for Clinical Densitometry. Dual-energy X-ray absorptiometry interpretation and reporting in children and adolescents: the revised 2013 ISCD Pediatric Official Positions. *J Clin Densitom* 2014;17(2):225-42.
